# Supplementary material
Source: PubMed Central journal article supplement (PMC11095977)
Supplement: NIHMS1954842-supplement-2.pdf [file NIHMS1954842-supplement-2.pdf]

# H3K27me3 Immunohistochemistry

8\_MPNST

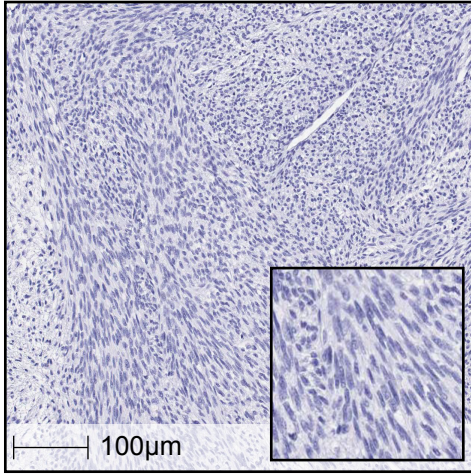

9\_MPNST

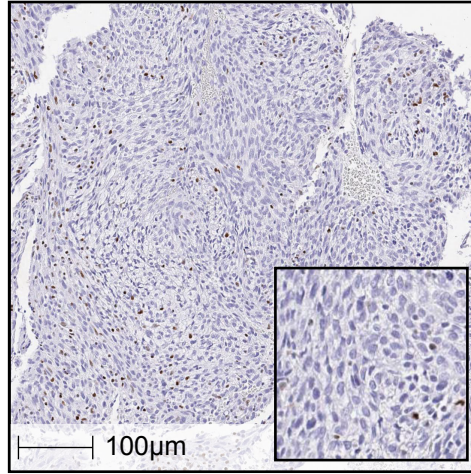

15\_MPNST

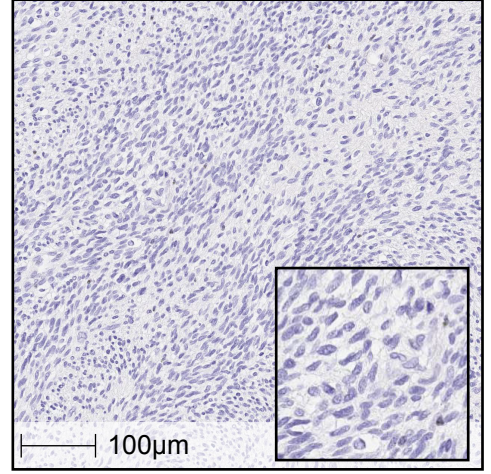

16\_MPNST

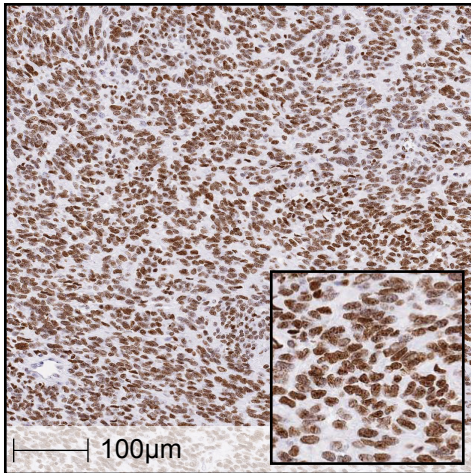

27\_MPNST

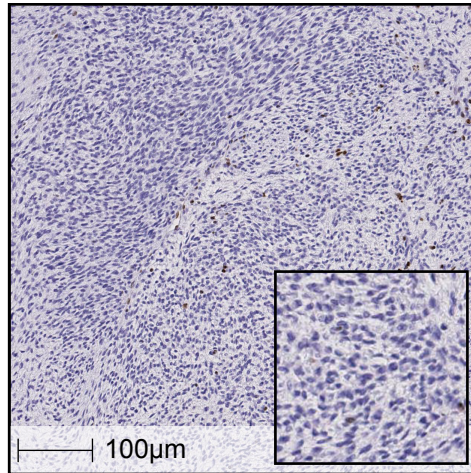

33\_MPNST

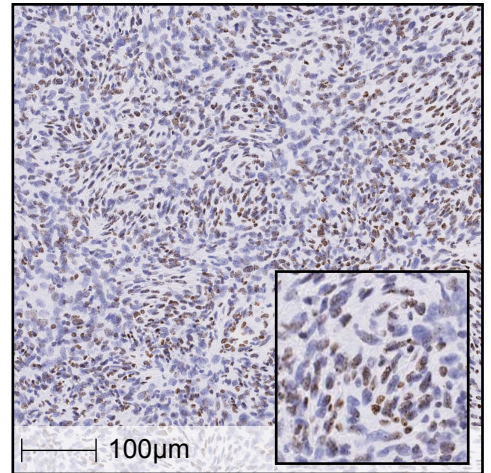

**Supplemental Figure 2. H3K27me3 immunohistochemical staining of MPNSTs.** Representative photomicrographs of immunohistochemical staining of H3K27me3 in MPNSTs included in this dataset. 16\_MPNST and 33\_MPNST exhibited positive H3K27me3 staining, while the remaining samples were negative. Magnification is denoted by 100  $\mu$ m scale bars with inset high-power magnification as shown.
