# Supplementary material
Source: PubMed Central journal article supplement (PMC11095977)
Supplement: NIHMS1954842-supplement-3.pdf [file NIHMS1954842-supplement-3.pdf]

Diagnosis

- PNF
- Cellular NF
- ANNUBP
- NF
- NF with atypia
- MPNST

Row Z-score

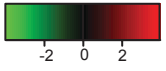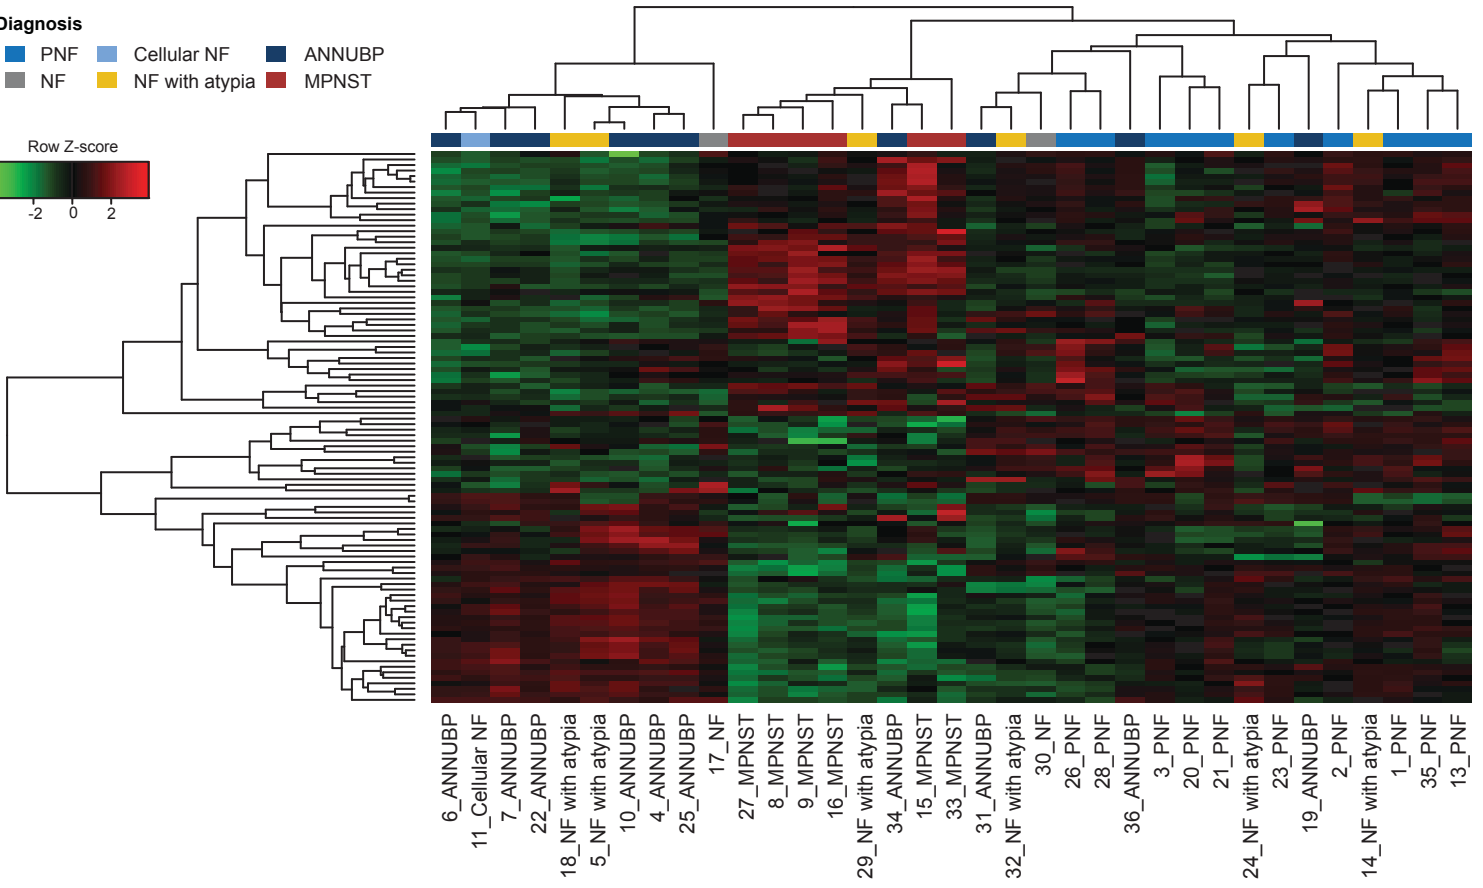

Supplemental Figure 3

**Supplemental Figure 3. PNF, ANNBP, and MPNST exhibit distinct global gene expression programs.** Hierarchically clustered heatmap of the top 100 differentially expressed genes. Rows represent individual genes and their respective expression  $\log_2$  normalized, z-score transformed expression values across each sample. Columns represent individual samples with tumor subtype annotated above. Rows and columns were clustered by correlation coefficient with average linkage.
