# Supplementary material
Source: PubMed Central journal article supplement (PMC11095977)
Supplement: NIHMS1954842-supplement-5.pdf [file NIHMS1954842-supplement-5.pdf]

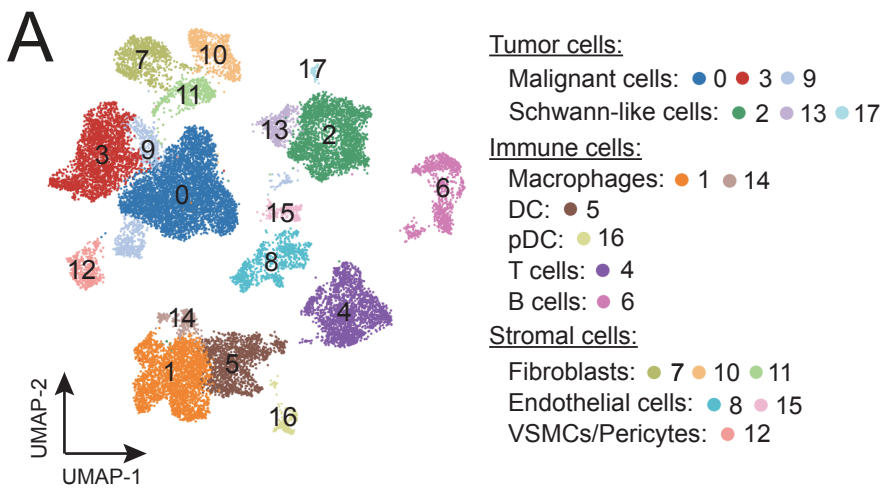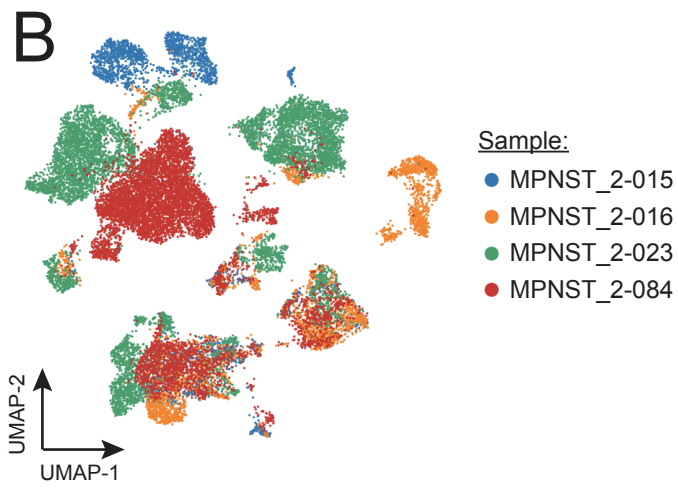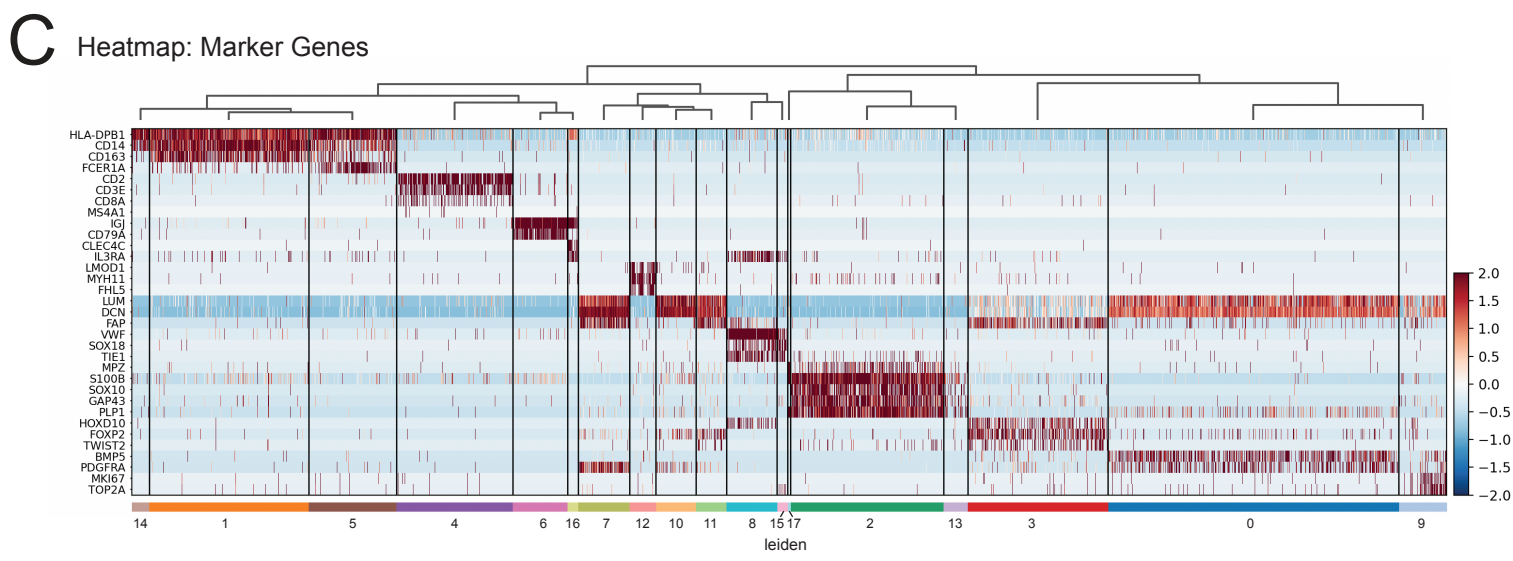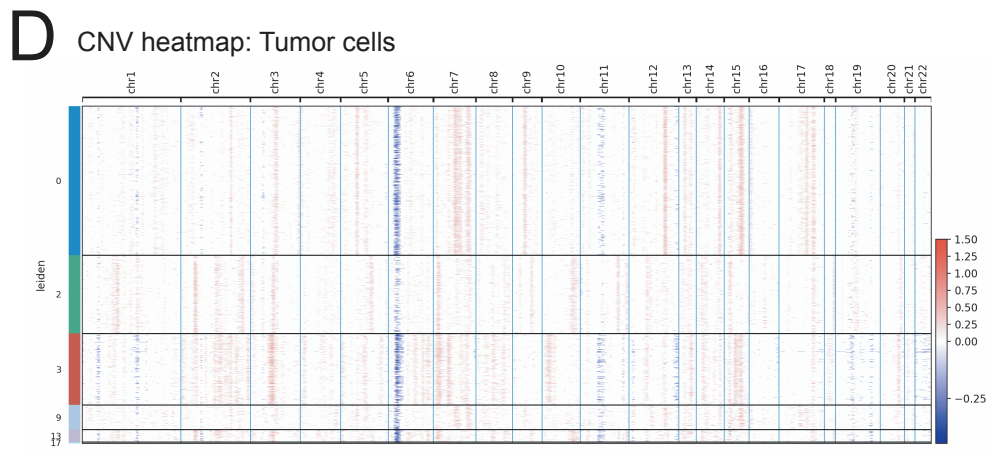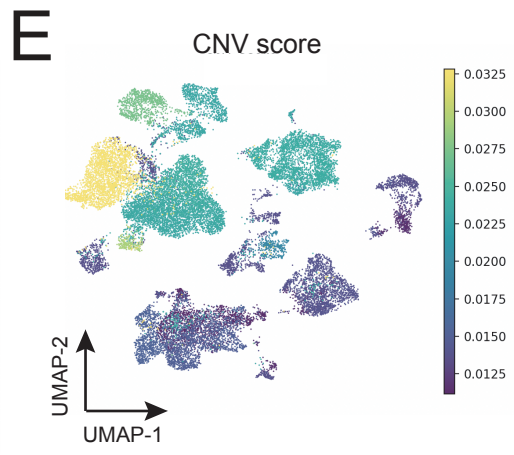

Supplemental Figure 5

**Supplemental Figure 5. scRNAseq analysis of human NF1-associated MPNST. (A)** UMAP plot of integrated scRNAseq data from four NF1-associated MPNST samples (n=21,969 cells) annotated by cluster ID and cell type. **(B)** UMAP visualization annotated by sample ID. **(C)** Heatmap of top marker genes for each cluster. **(D)** Heatmap of inferred CNVs in tumor cell clusters. **(E)** UMAP plot of CNV scores computed for each cell in the dataset.
