# Supplementary material
Source: PubMed Central journal article supplement (PMC11095977)
Supplement: NIHMS1954842-supplement-6.pdf [file NIHMS1954842-supplement-6.pdf]

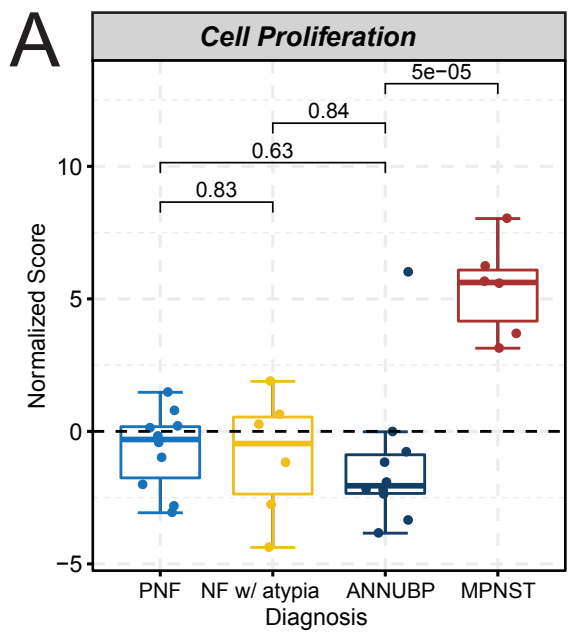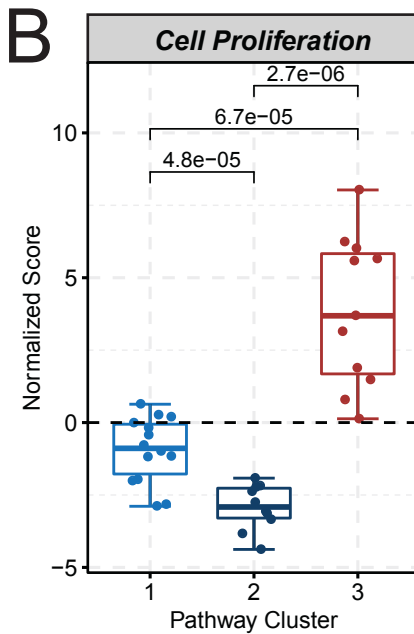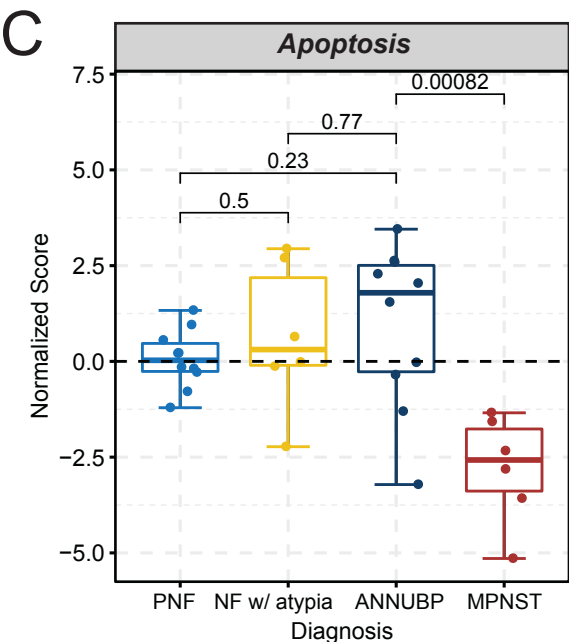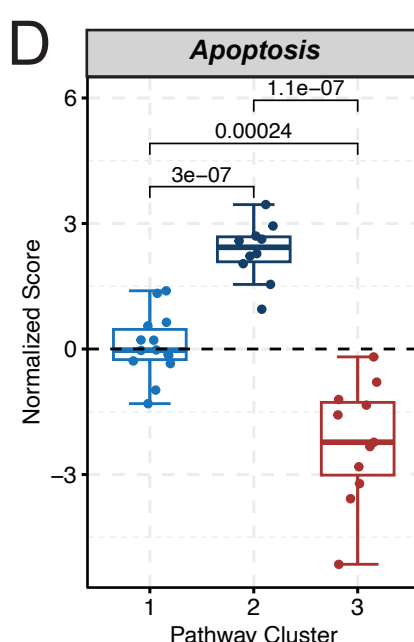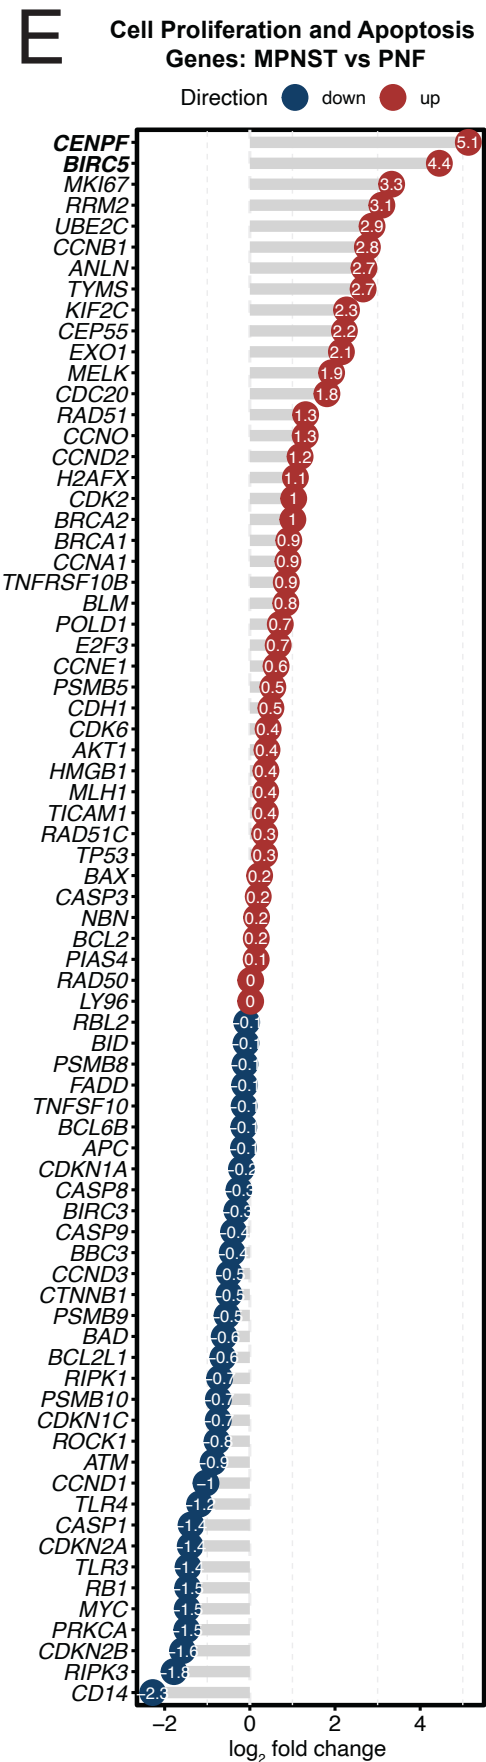

Supplemental Figure 6

**Supplemental Figure 6. Upregulation of cell proliferation and survival/apoptosis gene signatures in MPNST and Cluster 3 tumors. (A)** Box and whisker plot of normalized cell proliferation signature scores in PNF (n=10), NF with atypia (n=6), ANNUBP (n=10) and MPNST (n=6). Dots represent individual samples. Whiskers extend from the minima to maxima that are no further than 1.5x the inter-quartile range spanning the first to third quartiles. The center line represents the median. The box spans the 25<sup>th</sup> to 75<sup>th</sup> percentiles. Data beyond the whiskers are outliers and are plotted as individual points. P-values represent unpaired, two-tailed t-tests between groups as shown. **(B)** Box and whisker plot of normalized DNA damage repair signatures scores in Cluster 1 (n=14), Cluster 2 (n=10), and Cluster 3 (n=11) tumors. P-values represent unpaired, two-tailed t-tests for pairwise comparisons between groups as shown. **(C)** Box and whisker plot of normalized apoptosis signature scores in PNF (n=10), NF with atypia (n=6), ANNUBP (n=10) and MPNST (n=6). P-values represent unpaired, two-tailed t-tests for pairwise comparisons between groups as shown. **(D)** Box and whisker plot of normalized apoptosis signature scores in Cluster 1 (n=14), Cluster 2 (n=10), and Cluster 3 (n=11) tumors. P-values represent unpaired, two-tailed t-tests for pairwise comparisons between groups as shown. **(E)** Lollipop plot demonstrating the log<sub>2</sub> fold changes in apoptosis signature genes in MPNST (n=6) vs PNF (n=10).
