# Supplementary material
Source: PubMed Central journal article supplement (PMC11095977)
Supplement: NIHMS1954842-supplement-7.pdf [file NIHMS1954842-supplement-7.pdf]

# MPNST vs Normal Nerve

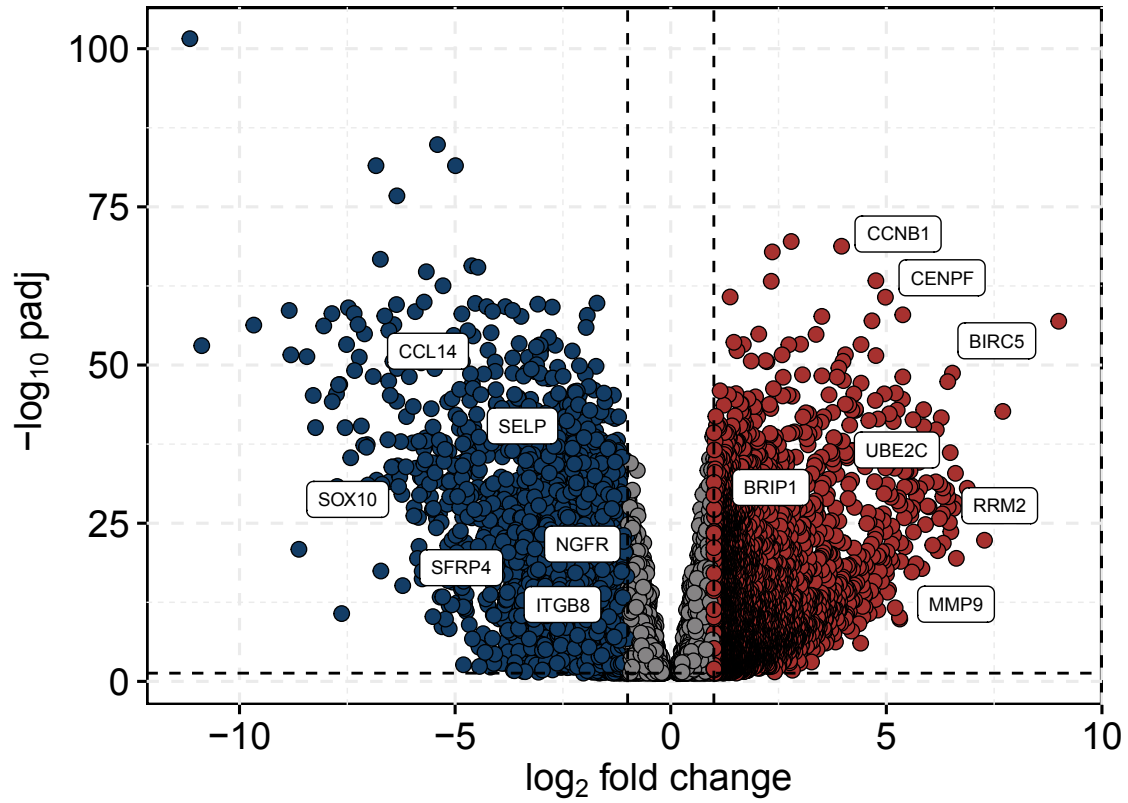

Supplemental Figure 7

**Supplemental Figure 7. Gene expression analysis of harmonized RNAseq data from normal nerve and MPNST samples obtained from GTEx and TCGA.** Volcano plot illustrating differentially expressed genes in MPNST vs Normal Nerve. The x-axis represents the  $\log_2$  fold change in gene expression, whereas the y-axis represents the  $-\log_{10}$  adjusted p-value. An adjusted p-value of 0.05 was set as the false discovery threshold as denoted by the dotted line. Genes with  $\log_2$  fold changes  $\geq 1$  are colored red, whereas those with  $\log_2$  fold changes  $\leq -1$  are colored blue.
