# Supplementary material
Source: PubMed Central journal article supplement (PMC11095977)
Supplement: NIHMS1954842-supplement-11.pdf [file NIHMS1954842-supplement-11.pdf]

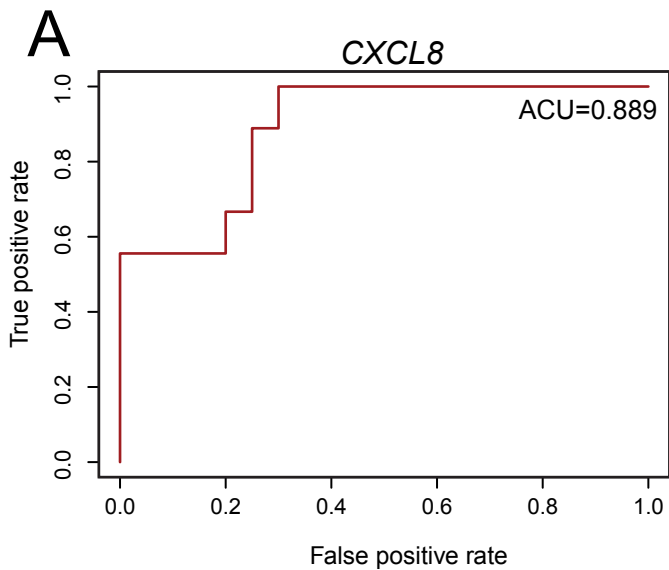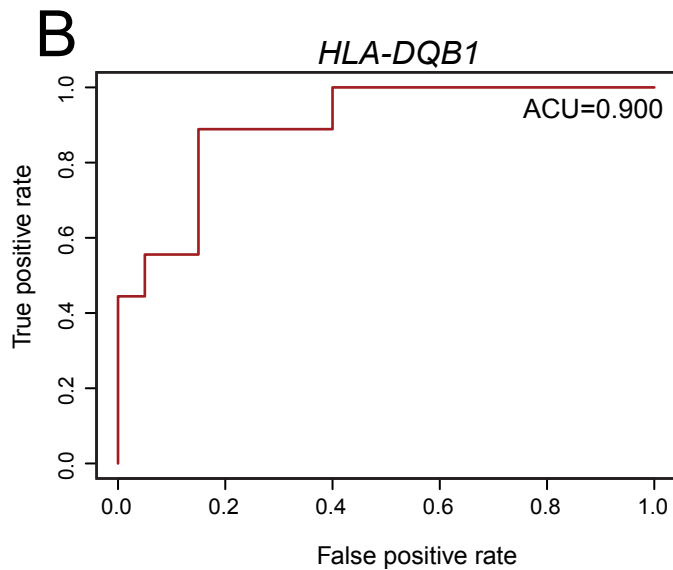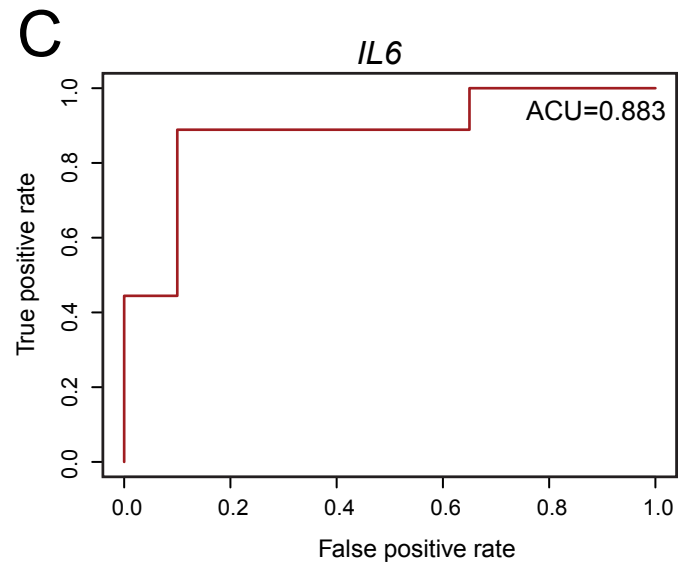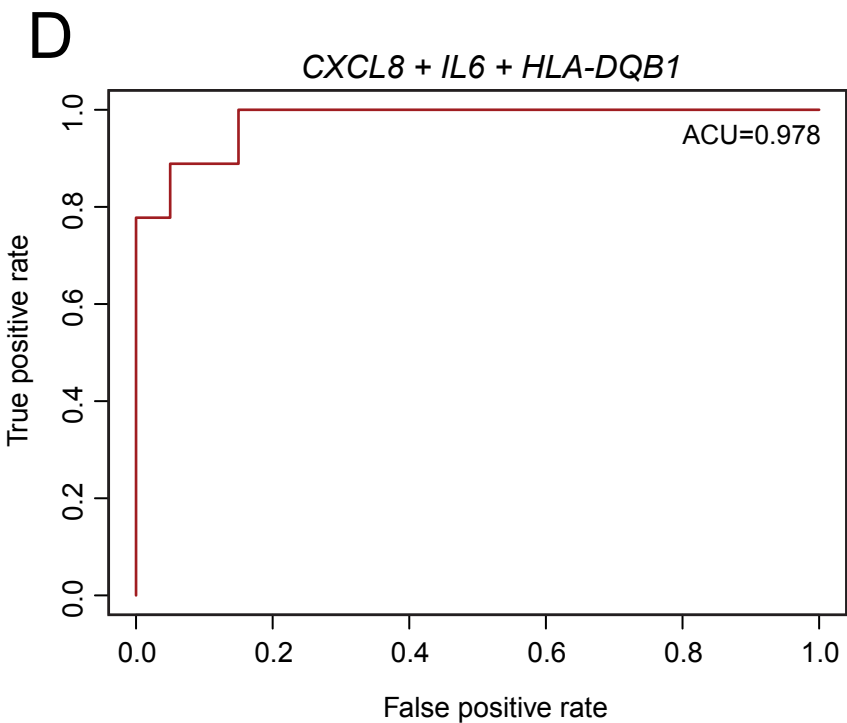

**E**

|            | Predicted 0 | Predicted 1 | Total |
|------------|-------------|-------------|-------|
| Observed 0 | 19          | 1           | 20    |
| Observed 1 | 1           | 8           | 9     |
| Total      | 20          | 9           | 29    |

  

|                               |       |
|-------------------------------|-------|
| Negative predictive power (%) | 95    |
| Positive predictive power (%) | 88.89 |

**Supplemental Figure 11. Diagnostic performance of a three gene signature (*CXCL8*, *HLA-DQB1* and *IL6*) to identify neurofibromas contiguous with MPNST.** Logistic regression analysis reveals an area under the receiver operating characteristic (ROC) curve of 0.889 (SE=0.06097, 95% CI: 0.7694 to 1.000,  $p<0.001$ ) for *CXCL8* (**A**), 0.0900 (SE=0.05830, 95% CI: 0.7857 to 1.000,  $p<0.0007$ ) for *HLA-DQB1* (**B**) and 0.8833 (SE=0.07503 95% CI: 0.7363 to 1.000,  $p<0.0011$ ) for *IL6* (**C**). Multiple logistic regression analysis further revealed an area under the ROC curve (**D**) of 0.9778 (SE=0.02246, 95% CI: 0.9338 to 1.000,  $p<0.0001$ ) suggesting that the expression of *CXCL8*, *HLA-DQB1* and *IL6* have excellent discriminatory ability for distinguishing lesions that are contiguous with MPNST from those that are not. The negative and positive predictive power were 95% and 88.89%, respectively (**E**).
